# Supplementary material for: Emergence and clonal expansion of a qacA-harbouring sequence type 45 lineage of methicillin-resistant Staphylococcus aureus
Source: PubMed Central journal article supplement (PMC10957945; doi:10.1038/s42003-024-06012-z), 2024-03-21
Supplement: 42003_2024_6012_MOESM3_ESM.pdf [file 42003_2024_6012_MOESM3_ESM.pdf]

## Description of Additional Supplementary Files

**File name:** Supplementary Data 1

**Description:** Metadata of isolates used in this study.

**File name:** Supplementary Data 2

**Description:** SNP typing of AUSMDU00020487 wild-type and mutants sequenced in this study.

**File name:** Supplementary Data 3

**Description:** Characterisation of genetic elements surrounding qacA.
