# Supplementary material for: Emergence and clonal expansion of a qacA-harbouring sequence type 45 lineage of methicillin-resistant Staphylococcus aureus
Source: Commun Biol. 2024 Mar 21;7:349. doi: 10.1038/s42003-024-06012-z (PMC10957945; doi:10.1038/s42003-024-06012-z)
Supplement: Supplementary file 2 — Supplementary Information [file 42003_2024_6012_MOESM2_ESM.pdf]

## Supplementary Information

### Supplementary Note 1: Bacterial isolates

To obtain a global representation of ST45 *S. aureus*, this study retrieved sequence data from three main sources (Supplementary Table 1). A total of 2,001 unique ST45 *S. aureus* genomes past our quality control criteria were selected for downstream analyses, and the associated metadata can be accessed in Supplementary Data 1.

Supplementary Table 1 – Demographic information of ST45 *S. aureus* sequence data used in this study

| Source                           | Description                                                                                                                                                                                                                                                                                                                                                                                                                                                                                                                                                                                                                                                                                                                                                                                                                                                                                                                                                                                                                                                                                                    | Quality control criteria         | Data type                        |
|----------------------------------|----------------------------------------------------------------------------------------------------------------------------------------------------------------------------------------------------------------------------------------------------------------------------------------------------------------------------------------------------------------------------------------------------------------------------------------------------------------------------------------------------------------------------------------------------------------------------------------------------------------------------------------------------------------------------------------------------------------------------------------------------------------------------------------------------------------------------------------------------------------------------------------------------------------------------------------------------------------------------------------------------------------------------------------------------------------------------------------------------------------|----------------------------------|----------------------------------|
| Staphopia                        | 1,503 ST45 <i>S. aureus</i> genomes were sourced from Staphopia, which contains the largest collection of publicly available <i>S. aureus</i> isolated before 2017 <sup>1</sup> .                                                                                                                                                                                                                                                                                                                                                                                                                                                                                                                                                                                                                                                                                                                                                                                                                                                                                                                              | Contig number < 200<br>MLST = 45 | <i>de novo</i> genome assemblies |
| European Nucleotide Archive      | 288 ST45 <i>S. aureus</i> genomes were sourced from ‘Global Epidemiology and Evolutionary History of <i>Staphylococcus aureus</i> ST45’ <sup>2</sup> .                                                                                                                                                                                                                                                                                                                                                                                                                                                                                                                                                                                                                                                                                                                                                                                                                                                                                                                                                         | Coverage ≥ 40<br>MLST = 45       | Illumina short reads             |
| Australian surveillance programs | To maximise diversity from different states and territories in Australia, 210 clonal complex 45 (CC45) MRSA were selected. These include: <ul style="list-style-type: none"> <li>13 isolates from the Australian and New Zealand Cooperative on Outcome in Staphylococcal Sepsis (ANZCOSS) study (BioProject PRJEB27932 &amp; PRJEB22792) <sup>3</sup>.</li> <li>6 isolates from the Vancomycin Efficacy in Staphylococcal Sepsis in Australasia (VANESSA) study (BioProject PRJEB27932 &amp; PRJEB22792) <sup>4</sup>.</li> <li>41 isolates from the 2015 Australian Staphylococcal Sepsis Outcome Program (ASSOP2015) <sup>5</sup>, kindly provided by the Australian Group on Antimicrobial Resistance (AGAR)*.</li> <li>39 isolates from the ASSOP2017 <sup>6</sup>, kindly provided by AGAR*.</li> <li>98 isolates from the ‘Controlling Superbugs’ study (BioProject PRJNA565795) that took place in the Victorian healthcare network <sup>7</sup>.</li> <li>13 isolates from Queensland surveillance of MRSA, kindly provided by the University of Queensland Centre for Clinical Research*.</li> </ul> | Coverage ≥ 40<br>CC = 45         | Illumina short reads             |

\* Genomic data are available upon reasonable request.

13 **Supplementary Figures**

14

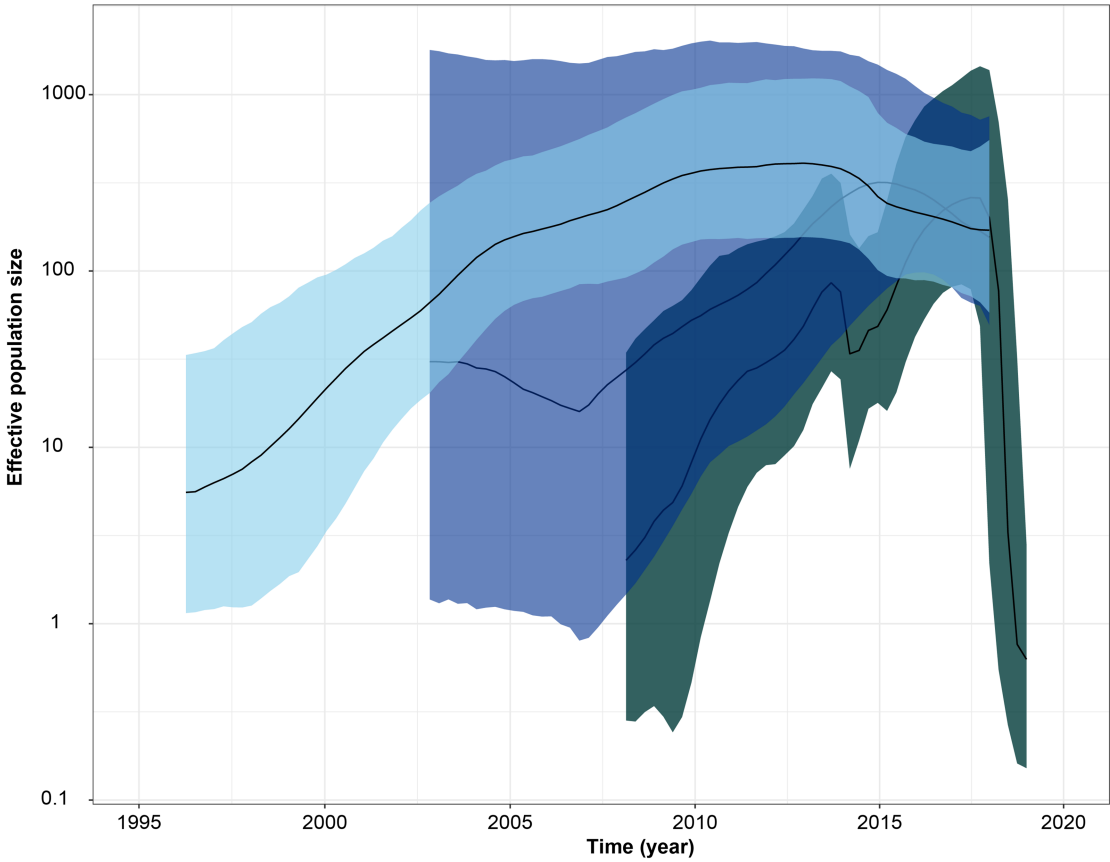

15

16 Supplementary Figure 1 – Gaussian Markov random field Bayesian skyride plot displaying  
17 effective population size (EPS) of the C2 (dark green), C4 (navy blue), and C6 (light blue)  
18 subclades. The solid black line indicates the median EPS, and the coloured boundary indicates  
19 the 95% highest posterior density (HPD).

20

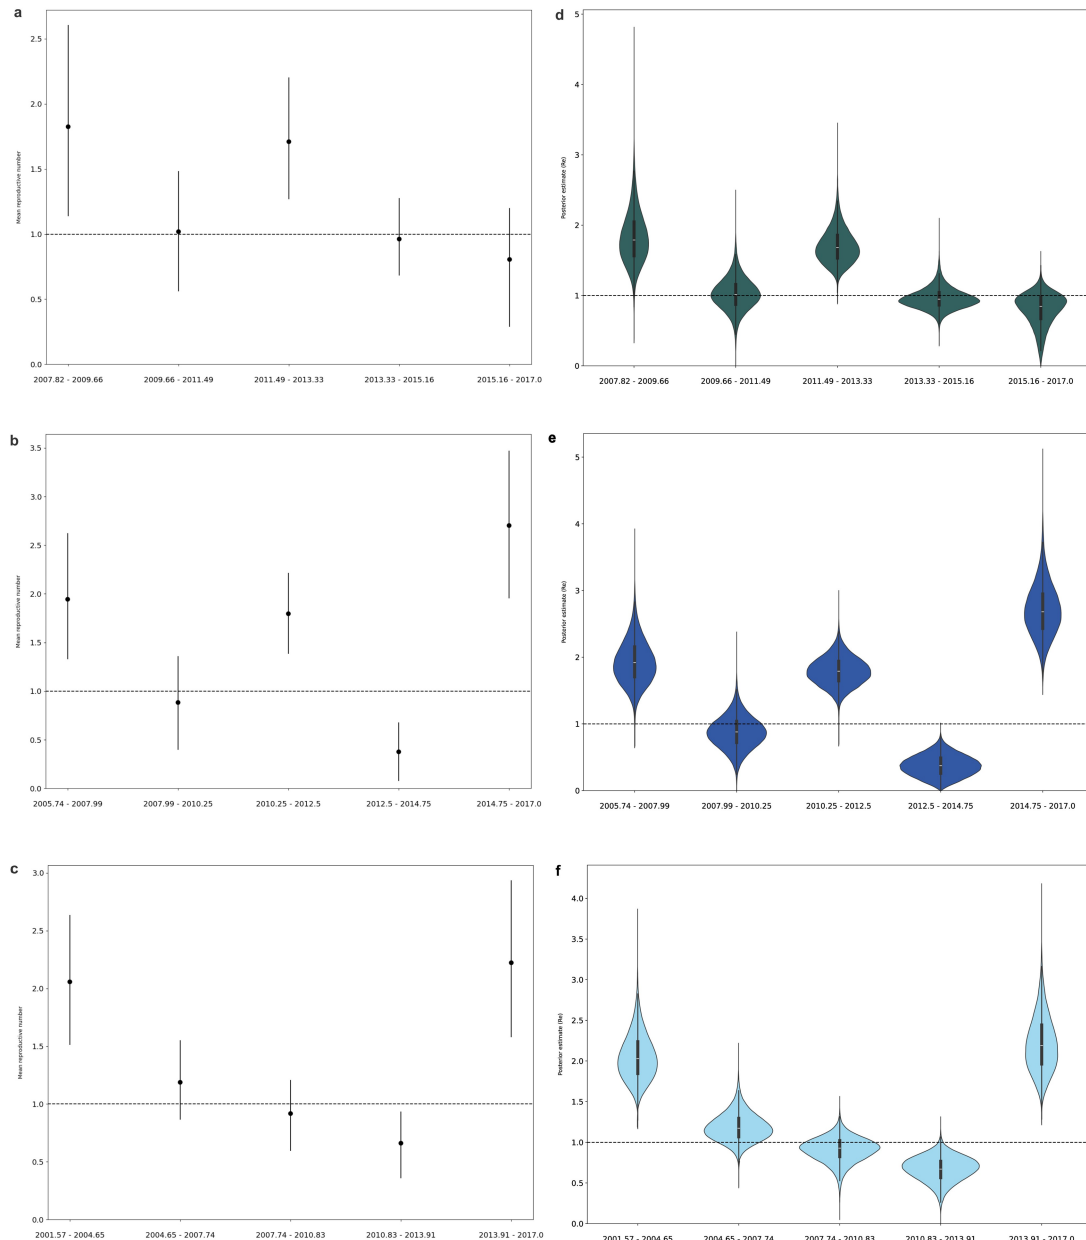

21

22 Supplementary Figure 2 – Birth death skyline estimates of the average effective reproduction  
 23 number ( $R_e$ ) for Australian ST45 MRSA subclades (a) C2B, (b) C4, and (c) C6. Confidence  
 24 intervals show the 95% HPD interval in each temporal segment of the sliced  $R_e$  parameter.  
 25 Posterior distributions of  $R_e$  for subclades (d) C2B, (e) C4, and (f) C6. Violin plots display the  
 26 standard kernel density estimate of the  $R_e$  posterior distribution for each sliced  $R_e$  parameter  
 27 across the estimated tree height (date ranges). Internal boxplots show the median (white  
 28 horizontal bar) and interquartile range (black vertical bar); the dotted lines denote the epidemic  
 29 threshold ( $R_e = 1$ ).

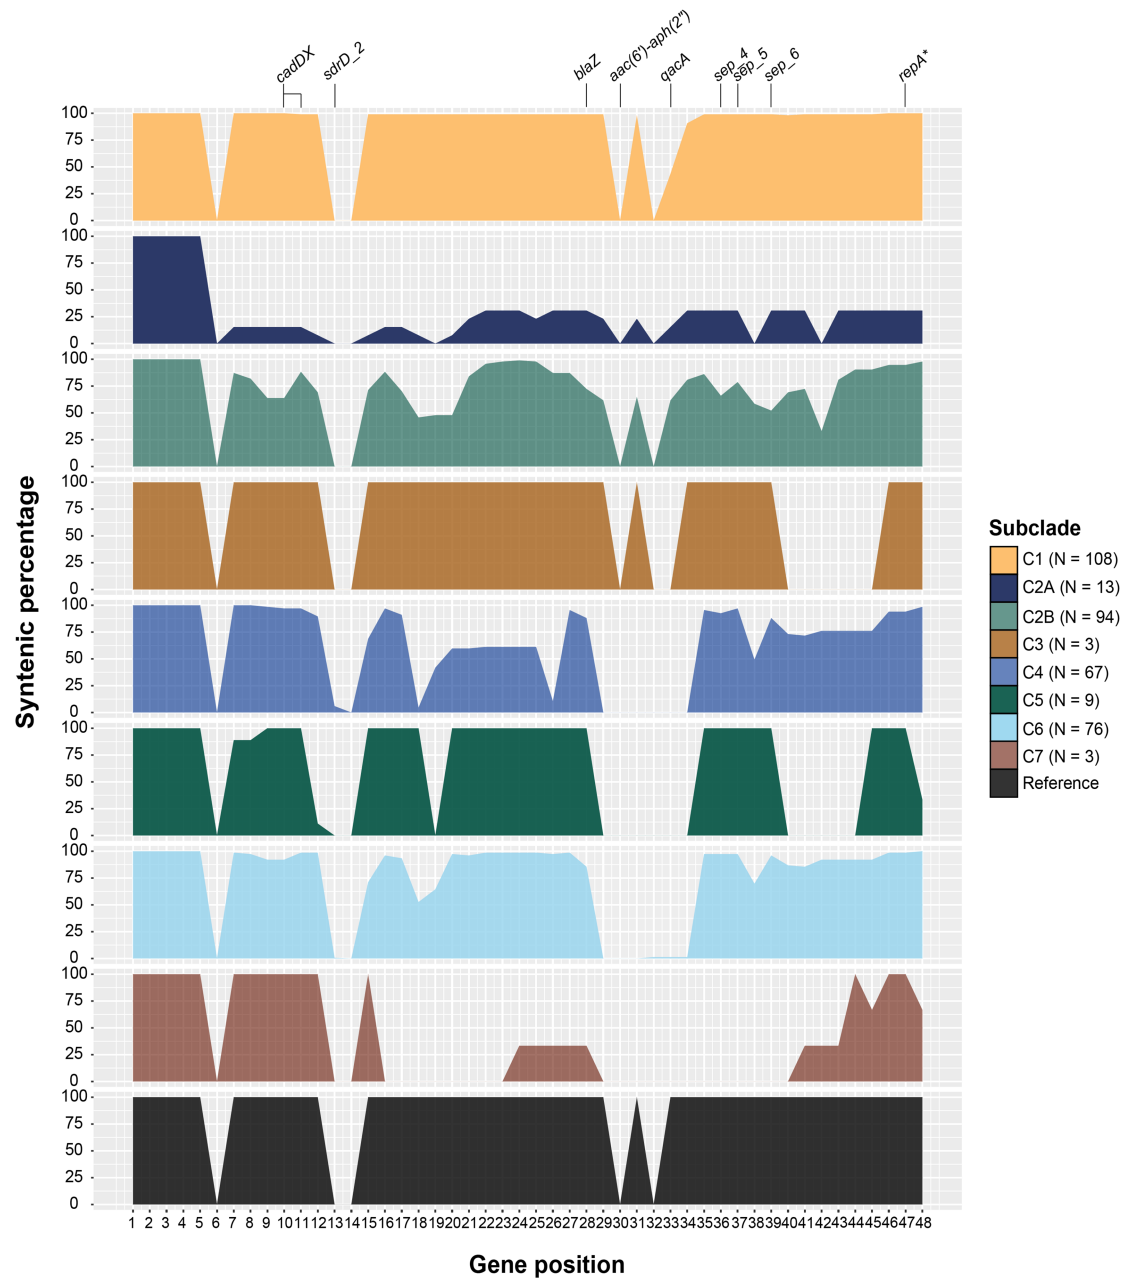

30

31 Supplementary Figure 3 – Comparison of gene synteny surrounding *qacA* between major clades  
 32 in Bayesian phylogeny (Figure 2a). Genes were considered syntenic if they were physically  
 33 linked on the same contig in *de novo* genome assemblies. Syntenic percentages were calculated  
 34 by normalising accumulated score of gene synteny by total number of isolates in a given clade.  
 35 These were then compared to the assembly of the AUSMDU00020487 genome using Illumina  
 36 short-reads.

37

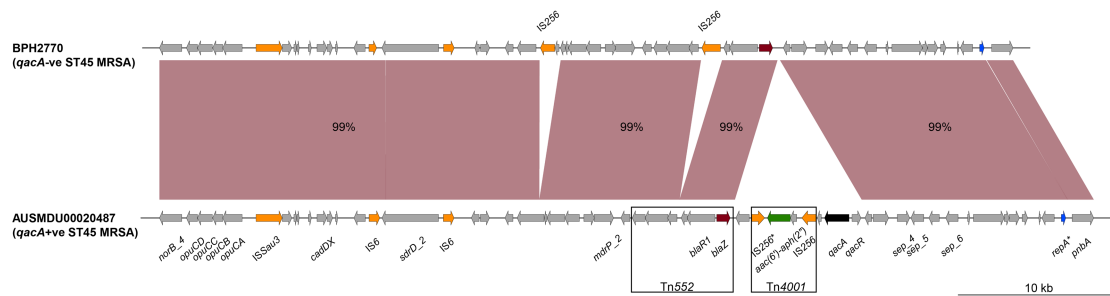

Supplementary Figure 4 – Genomic configuration of *qacA* surrounding region in AUSMDU00020487, in comparison to pF5 and pSK1 plasmids. Regions of homology ( $\geq 70\%$ ) between sequences are highlighted in the darker shades of red and blue (inversion). CDSs are shown with grey arrows. ISs (orange), plasmid replication initiator gene (blue), and AMR genes including, *blaZ* (red), *aac(6')-aph(2'')* (green) and *qacA* (black) are highlighted. Asterisks indicate gene fragmentation.

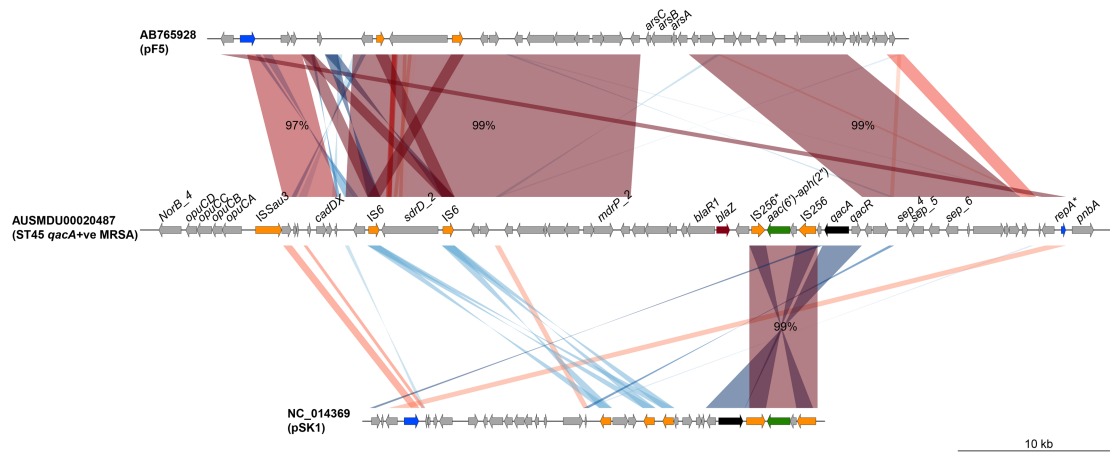

Supplementary Figure 5 – Pairwise sequence alignment between AUSMDU00020487 and BPH2770 depicting the site of *qacA* integration. Regions of homology ( $\geq 70\%$ ) between two sequences are highlighted in reddish orange. CDSs are shown with grey arrows. ISs (orange), plasmid replication initiator gene, *repA* (blue), and AMR genes including, *blaZ* (red), *aac(6')-aph(2'')* (green), and *qacA* (black) are highlighted. Asterisks indicate gene fragmentation. Black rectangle boxes outline the boundary of transposons, Tn552 and Tn4001.

584aa *tnp*

IRL: 5' - **AAAAAA**GAGTCTGGGACAT

IRR: ATGTCCCAAGCTCAAGAGC - 3'

**D**

M96909  
(*qacA*-ve ST45 MRSA  
from Clade C2A)

AUSMDU00020487  
(*qacA*+ve ST45 MRSA  
Reference)

99%

99%

10 kb

Supplementary Figure 6 – Schematic diagram illustrating ISSau3-mediated excision of *qacA* surrounding region. **a** Genetic organisation of ISSau3. The yellow arrow represents transposase (*tnp*) consisting of 548 amino acids. The grey triangles indicate the direction of 13 bp left and right inverted repeats (IRL and IRR) with nucleotide sequences underlined. A 6 bp homopolymer of adenine highlighted in red was identified upstream of IRL. **b** Sequence alignment between AUSMDU00020487 and M96909 showed an excision of *qacA* surrounding region likely mediated with ISSau3, as the potential target direct repeat was identified in the nucleotide alignment. Regions of homology ( $\geq 99\%$ ) between two sequences are highlighted in reddish orange.

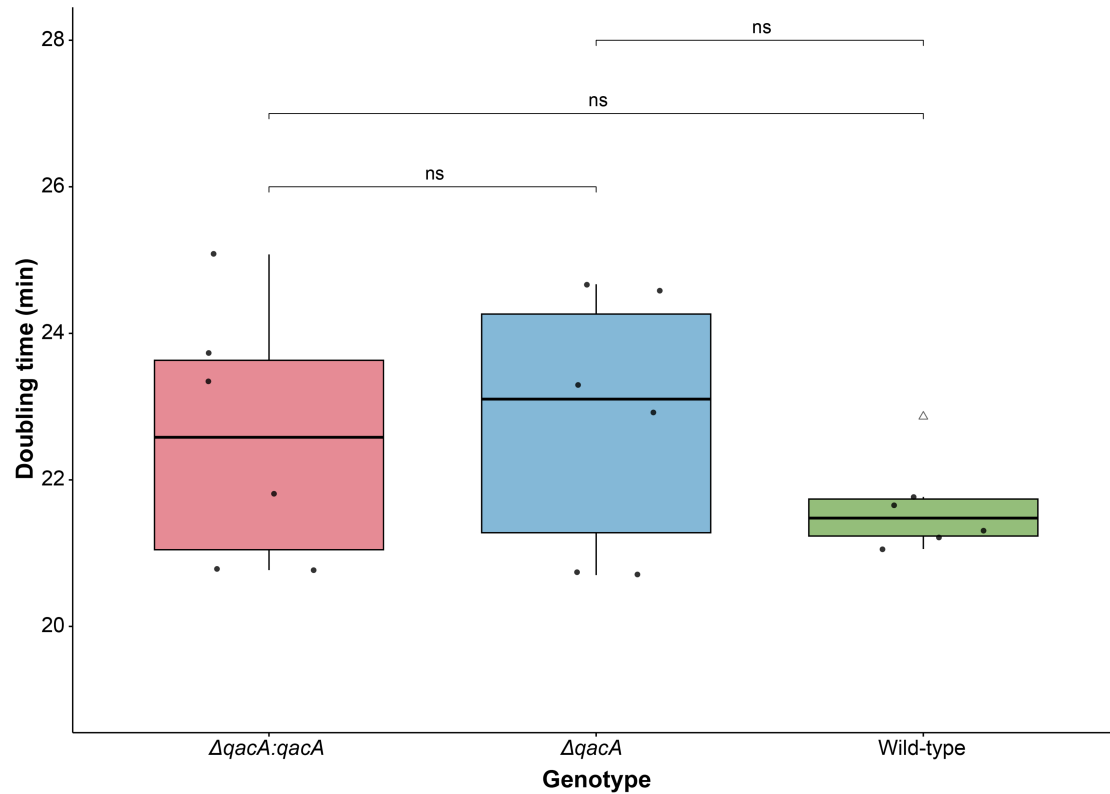

Supplementary Figure 7 – Doubling time of AUSMDU00020487 wild-type,  $\Delta qacA$ , and  $\Delta qacA:qacA$  strains. Six biological replicates denoted by the black dots were used for determining doubling times depicted with Tukey whisker boxplots. The outlier is indicated by the black triangle. No significant difference (ns,  $p > 0.05$  by unpaired  $t$  test) in the mean doubling time was observed among the wild-type (mean  $\pm$  standard error of the mean =  $21.40 \pm 0.13$  min; excluding outlier),  $\Delta qacA$  ( $22.82 \pm 0.72$  min), and  $\Delta qacA:qacA$  strain ( $22.59 \pm 0.71$  min).

## Supplementary References

1. Petit, R.A., 3rd and T.D. Read, *Staphylococcus Aureus Viewed from the Perspective of 40,000+ Genomes*. PeerJ, 2018. **6**: p. e5261-e5261.
2. Effelsberg, N., et al., *Global Epidemiology and Evolutionary History of Staphylococcus Aureus St45*. Journal of Clinical Microbiology, 2020. **59**(1).
3. Turnidge, J.D., et al., *Staphylococcus Aureus Bacteraemia: A Major Cause of Mortality in Australia and New Zealand*. Medical Journal of Australia, 2009. **191**(7): p. 368-373.
4. Holmes, N.E., et al., *Morbidity from in-Hospital Complications Is Greater Than Treatment Failure in Patients with Staphylococcus Aureus Bacteraemia*. BMC Infectious Diseases, 2018. **18**(1): p. 107.
5. Coombs, G.W., et al., *Australian Group on Antimicrobial Resistance (Agar) Australian Staphylococcus Aureus Sepsis Outcome Programme (Assop) Annual Report 2015*. Communicable Diseases Intelligence (2018), 2018. **42**.
6. Coombs, G., et al., *Australian Group on Antimicrobial Resistance (Agar) Australian Staphylococcus Aureus Sepsis Outcome Programme (Assop) Annual Report 2017*. Communicable Diseases Intelligence, 2019. **43**.
7. Sherry, N., et al., *Genomic Interrogation of the Burden and Transmission of Multidrug-Resistant Pathogens within and across Hospital Networks*. 2019.
